# Supplementary material
Source: MDPI journal article supplement (https://www.mdpi.com/2071-1050/15/20/14827)
Supplement: s1 [file s1]

Archive with 2 entries (2 files):
- Supplementary File S1_ Simapro Impact References List.pdf
- Supplementary File S2_ Improvement Proposals Assessment ScoresV2.pdf
